# Supplementary material
Source: PubMed Central journal article supplement (PMC8842568)
Supplement: NIHMS1582958-supplement-Supplemental_Material.pdf [file NIHMS1582958-supplement-Supplemental_Material.pdf]

## SUPPLEMENTAL MATERIAL

**Supplemental Tables A-G.** Code lists for index surgery, AAA-related reintervention, abdominal wall procedures, vascular and other procedures and surveillance imaging events

### A. *Index open repair* (ICD-9-CM procedure codes)

|       |                                                             |
|-------|-------------------------------------------------------------|
| 38.04 | Incision of vessel, aorta                                   |
| 38.06 | Incision of vessel, abdominal arteries                      |
| 38.08 | Incision of vessel, lower limb arteries                     |
| 38.14 | Endarterectomy, aorta                                       |
| 38.16 | Endarterectomy, abdominal arteries                          |
| 38.18 | Endarterectomy, lower limb arteries                         |
| 38.34 | Resection of vessel with anastomosis, aorta                 |
| 38.36 | Resection of vessel with anastomosis, abdominal arteries    |
| 38.38 | Resection of vessel with anastomosis, lower limb arteries   |
| 38.44 | Resection of vessel with replacement, aorta, abdominal      |
| 38.46 | Resection of vessel with replacement, abdominal arteries    |
| 38.48 | Resection of vessel with replacement, lower limb arteries   |
| 38.64 | Other excision of vessels, aorta, abdominal                 |
| 38.66 | Other excision of vessels, abdominal arteries               |
| 38.68 | Other excision of vessels, lower limb arteries              |
| 38.84 | Other surgical occlusion of vessels, aorta, abdominal       |
| 38.86 | Other surgical occlusion of vessels, abdominal arteries     |
| 38.88 | Other surgical occlusion of vessels, lower limb arteries    |
| 38.91 | Arterial catheterization                                    |
| 39.24 | aortic renal bypass                                         |
| 39.25 | Aorta-iliac-femoral bypass                                  |
| 39.26 | Other intra-abdominal vascular shunt or bypass              |
| 39.29 | Other (peripheral) vascular shunt or bypass                 |
| 39.30 | Suture of unspecified blood vessel                          |
| 39.31 | Suture of artery                                            |
| 39.50 | Angioplasty of other non-coronary vessel(s)                 |
| 39.51 | Clipping of aneurysm                                        |
| 39.52 | Other repair of aneurysm                                    |
| 39.54 | Re-entry operation (aorta)                                  |
| 39.56 | Repair of blood vessel with tissue patch graft              |
| 39.57 | Repair of blood vessel with synthetic patch graft           |
| 39.58 | Repair of blood vessel with unspecified type of patch graft |
| 39.59 | Other repair of vessel                                      |

### B. *Index endovascular repair* (ICD-9-CM procedure codes)

|       |                                                                                           |
|-------|-------------------------------------------------------------------------------------------|
| 39.71 | Endovascular implantation of other graft in abdominal aorta                               |
| 39.72 | Endovascular (total) embolization or occlusion of head and neck vessels                   |
| 39.73 | Endovascular implantation of graft in thoracic aorta                                      |
| 39.74 | Endovascular removal of obstruction from head and neck vessel(s)                          |
| 39.75 | Endovascular embolization or occlusion of vessel(s) of head or neck using bare coils      |
| 39.76 | Endovascular embolization or occlusion of vessel(s) of head or neck using bioactive coils |
| 39.77 | Temporary (partial) therapeutic endovascular occlusion of vessel                          |
| 39.78 | Temporary (partial) therapeutic endovascular occlusion of vessel                          |
| 39.79 | Other endovascular procedures on other vessels                                            |
| 39.90 | Insertion of non-drug-eluting peripheral (non-coronary) vessel stent(s)                   |

**C. AAA-related reintervention (ICD-9-CM procedure codes)**

|       |                                                                                           |
|-------|-------------------------------------------------------------------------------------------|
| 39.24 | Aorta-renal bypass                                                                        |
| 39.49 | Other revision of vascular procedure                                                      |
| 39.73 | Endovascular implantation of graft in thoracic aorta                                      |
| 38.04 | Incision of vessel, aorta                                                                 |
| 38.06 | Incision of vessel, abdominal arteries                                                    |
| 38.08 | Incision of vessel, lower limb arteries                                                   |
| 38.14 | Endarterectomy, aorta                                                                     |
| 38.16 | Endarterectomy, abdominal arteries                                                        |
| 38.18 | Endarterectomy, lower limb arteries                                                       |
| 38.34 | Resection of vessel with anastomosis, aorta                                               |
| 38.38 | Resection of vessel with anastomosis, lower limb arteries                                 |
| 38.44 | Resection of vessel with replacement, aorta, abdominal                                    |
| 38.46 | Resection of vessel with replacement, abdominal arteries                                  |
| 38.64 | Other excision of vessels, aorta, abdominal                                               |
| 38.66 | Other excision of vessels, abdominal arteries                                             |
| 38.68 | Other excision of vessels, lower limb arteries                                            |
| 38.84 | Other surgical occlusion of vessels, aorta, abdominal                                     |
| 38.86 | Other surgical occlusion of vessels, abdominal arteries                                   |
| 38.88 | Other surgical occlusion of vessels, lower limb arteries                                  |
| 38.91 | Arterial catheterization                                                                  |
| 39.25 | Aorta-iliac-femoral bypass                                                                |
| 39.26 | Other intra-abdominal vascular shunt or bypass                                            |
| 39.29 | Other (peripheral) vascular shunt or bypass                                               |
| 39.30 | Suture of unspecified blood vessel                                                        |
| 39.31 | Suture of artery                                                                          |
| 39.51 | Clipping of aneurysm                                                                      |
| 39.52 | Other repair of aneurysm                                                                  |
| 39.54 | Re-entry operation (aorta)                                                                |
| 39.56 | Repair of blood vessel with tissue patch graft                                            |
| 39.57 | Repair of blood vessel with synthetic patch graft                                         |
| 39.58 | Repair of blood vessel with unspecified type of patch graft                               |
| 39.59 | Other repair of vessel                                                                    |
| 39.71 | Endovascular implantation of other graft in abdominal aorta                               |
| 39.72 | Endovascular (total) embolization or occlusion of head and neck vessels                   |
| 39.74 | Endovascular removal of obstruction from head and neck vessel(s)                          |
| 39.75 | Endovascular embolization or occlusion of vessel(s) of head or neck using bare coils      |
| 39.76 | Endovascular embolization or occlusion of vessel(s) of head or neck using bioactive coils |
| 39.77 | Temporary (partial) therapeutic endovascular occlusion of vessel                          |
| 39.78 | Temporary (partial) therapeutic endovascular occlusion of vessel                          |
| 39.79 | Other endovascular procedures on other vessels                                            |
| 39.90 | Insertion of non-drug-eluting peripheral (non-coronary) vessel stent(s)                   |

**D. Abdominal wall procedures (ICD-9-CM procedure codes)**

|       |                                                                            |
|-------|----------------------------------------------------------------------------|
| 53.9x | Other hernia repair                                                        |
| 54.4x | Excision or destruction of peritoneal tissue                               |
| 54.11 | Exploratory laparotomy                                                     |
| 54.19 | Other laparotomy                                                           |
| 54.59 | Other lysis of peritoneal adhesions                                        |
| 54.64 | Suture of peritoneum                                                       |
| 54.73 | Other repair of peritoneum                                                 |
| 54.92 | Removal of foreign body from peritoneal cavity                             |
| 54.95 | Incision of peritoneum                                                     |
| 54.0x | Incision of abdominal wall                                                 |
| 54.3x | Excision or destruction of lesion or tissue of abdominal wall or umbilicus |

|       |                                                                                               |
|-------|-----------------------------------------------------------------------------------------------|
| 53.41 | Other and open repair of umbilical hernia with graft or prosthesis                            |
| 53.42 | Laparoscopic repair of umbilical hernia with graft or prosthesis                              |
| 53.43 | Other laparoscopic umbilical herniorrhaphy                                                    |
| 53.49 | Other open umbilical herniorrhaphy                                                            |
| 53.51 | Incisional hernia repair                                                                      |
| 53.59 | Repair of other hernia of anterior abdominal wall                                             |
| 53.61 | Other open incisional hernia repair with graft or prosthesis                                  |
| 53.62 | Laparoscopic incisional hernia repair with graft or prosthesis                                |
| 53.63 | Other laparoscopic repair of other hernia of anterior abdominal wall with graft or prosthesis |
| 53.69 | Other and open repair of other hernia of anterior abdominal wall with graft or prosthesis     |
| 53.71 | Laparoscopic repair of diaphragmatic hernia, abdominal approach                               |
| 53.72 | Other and open repair of diaphragmatic hernia, abdominal approach                             |
| 53.75 | Repair of diaphragmatic hernia, abdominal approach, not otherwise specified                   |
| 53.80 | Repair of diaphragmatic hernia with thoracic approach, not otherwise specified                |
| 53.81 | Plication of the diaphragm                                                                    |
| 53.82 | Repair of parasternal hernia                                                                  |
| 53.83 | Laparoscopic repair of diaphragmatic hernia, with thoracic approach                           |
| 53.84 | Other and open repair of diaphragmatic hernia, with thoracic approach                         |
| 54.12 | Reopening of recent laparotomy site                                                           |
| 54.21 | Laparoscopy                                                                                   |
| 54.22 | Biopsy of abdominal wall or umbilicus                                                         |
| 54.61 | Reclosure of postoperative disruption of abdominal wall                                       |
| 54.62 | Delayed closure of granulating abdominal wound                                                |
| 54.63 | Other suture of abdominal wall                                                                |
| 54.71 | Repair of gastroschisis                                                                       |
| 54.72 | Other repair of abdominal wall                                                                |

**E. Other vascular procedures (ICD-9-CM procedure codes)**

|       |                                                                                                               |
|-------|---------------------------------------------------------------------------------------------------------------|
| 38.7x | Interruption of the vena cava                                                                                 |
| 37.99 | Other operations on heart and pericardium                                                                     |
| 38.00 | Incision of vessel, unspecified site                                                                          |
| 38.01 | Incision of vessel, intracranial vessels                                                                      |
| 38.02 | Incision of vessel, other vessels of head and neck                                                            |
| 38.03 | Incision of vessel, upper limb vessels                                                                        |
| 38.05 | Incision of vessel, other thoracic vessels                                                                    |
| 38.07 | Incision of vessel, abdominal veins                                                                           |
| 38.09 | Incision of vessel, lower limb veins                                                                          |
| 38.10 | Endarterectomy, unspecified site                                                                              |
| 38.11 | Endarterectomy, intracranial vessels                                                                          |
| 38.12 | Endarterectomy, other vessels of head and neck                                                                |
| 38.13 | Endarterectomy, upper limb vessels                                                                            |
| 38.15 | Endarterectomy, other thoracic vessels                                                                        |
| 38.21 | Biopsy of blood vessel                                                                                        |
| 38.26 | Insertion of implantable pressure sensor without lead for intracardiac or great vessel hemodynamic monitoring |
| 38.29 | Other diagnostic procedures on blood vessels                                                                  |
| 38.30 | Resection of vessel with anastomosis, unspecified site                                                        |
| 38.31 | Resection of vessel with anastomosis, intracranial vessels                                                    |
| 38.32 | Resection of vessel with anastomosis, other vessels of head and neck                                          |
| 38.33 | Resection of vessel with anastomosis, upper limb vessels                                                      |
| 38.35 | Resection of vessel with anastomosis, other thoracic vessels                                                  |
| 38.36 | Resection of vessel with anastomosis, abdominal arteries                                                      |
| 38.37 | Resection of vessel with anastomosis, abdominal veins                                                         |
| 38.39 | Resection of vessel with anastomosis, lower limb veins                                                        |
| 38.40 | Resection of vessel with replacement, unspecified site                                                        |
| 38.41 | Resection of vessel with replacement, intracranial vessels                                                    |
| 38.42 | Resection of vessel with replacement, other vessels of head and neck                                          |
| 38.43 | Resection of vessel with replacement, upper limb vessels                                                      |
| 38.45 | Resection of vessel with replacement, thoracic vessels                                                        |

|       |                                                                     |
|-------|---------------------------------------------------------------------|
| 38.48 | Resection of vessel with replacement, lower limb arteries           |
| 38.60 | Other excision of vessels, unspecified site                         |
| 38.61 | Other excision of vessels, intracranial vessels                     |
| 38.62 | Other excision of vessels, other vessels of head and neck           |
| 38.63 | Other excision of vessels, upper limb vessels                       |
| 38.65 | Other excision of vessels, thoracic vessels                         |
| 38.67 | Other excision of vessels, abdominal veins                          |
| 38.69 | Other excision of vessels, lower limb veins                         |
| 38.80 | Other surgical occlusion of vessels, unspecified site               |
| 38.81 | Other surgical occlusion of vessels, intracranial vessels           |
| 38.82 | Other surgical occlusion of vessels, other vessels of head and neck |
| 38.83 | Other surgical occlusion of vessels, upper limb vessels             |
| 38.85 | Other surgical occlusion of vessels, thoracic vessels               |
| 38.87 | Other surgical occlusion of vessels, abdominal veins                |
| 38.89 | Other surgical occlusion of vessels, lower limb veins               |
| 39.23 | Other intrathoracic vascular shunt or bypass                        |
| 39.50 | Angioplasty of other non-coronary vessel(s)                         |
| 39.53 | Repair of arteriovenous fistula                                     |
| 39.55 | Reimplantation of aberrant renal vessel                             |
| 39.91 | Freeing of vessel                                                   |

**F. Other non-vascular procedures (ICD-9-CM procedure codes)**

|       |                                                                        |
|-------|------------------------------------------------------------------------|
| 41.5x | Total splenectomy                                                      |
| 43.5x | Partial gastrectomy with anastomosis to esophagus                      |
| 43.6x | Partial gastrectomy with anastomosis to duodenum                       |
| 43.7x | Partial gastrectomy with anastomosis to jejunum                        |
| 47.2x | Drainage of appendiceal abscess                                        |
| 48.0x | Proctotomy                                                             |
| 48.1x | Proctostomy                                                            |
| 41.43 | Partial splenectomy                                                    |
| 42.39 | Other destruction of lesion or tissue of esophagus                     |
| 42.40 | Esophagectomy, not otherwise specified                                 |
| 42.41 | Partial esophagectomy                                                  |
| 42.42 | Total esophagectomy                                                    |
| 42.51 | Intrathoracic esophagoesophagostomy                                    |
| 42.52 | Intrathoracic esophagogastrostomy                                      |
| 42.53 | Intrathoracic esophageal anastomosis with interposition of small bowel |
| 42.54 | Other intrathoracic esophagoenterostomy                                |
| 42.55 | Intrathoracic esophageal anastomosis with interposition of colon       |
| 42.56 | Other intrathoracic esophagocolostomy                                  |
| 42.58 | Intrathoracic esophageal anastomosis with other interposition          |
| 42.59 | Other intrathoracic anastomosis of esophagus                           |
| 42.61 | Antesternal esophagoesophagostomy                                      |
| 42.62 | Antesternal esophagogastrostomy                                        |
| 42.63 | Antesternal esophageal anastomosis with interposition of small bowel   |
| 42.64 | Other antesternal esophagoenterostomy                                  |
| 42.65 | Antesternal esophageal anastomosis with interposition of colon         |
| 42.66 | Other antesternal esophagocolostomy                                    |
| 42.68 | Other antesternal esophageal anastomosis with interposition            |
| 42.69 | Other antesternal anastomosis of esophagus                             |
| 43.81 | Partial gastrectomy with jejunal transposition                         |
| 43.89 | Open and other partial gastrectomy                                     |
| 44.99 | Other operations on stomach                                            |
| 45.00 | Incision of intestine, not otherwise specified                         |
| 45.01 | Incision of duodenum                                                   |
| 45.02 | Other incision of small intestine                                      |
| 45.03 | Incision of large intestine                                            |
| 45.11 | Transabdominal endoscopy of small intestine                            |

|       |                                                                    |
|-------|--------------------------------------------------------------------|
| 45.15 | Open biopsy of small intestine                                     |
| 45.61 | Multiple segmental resection of small intestine                    |
| 45.62 | Other partial resection of small intestine                         |
| 45.63 | Total removal of small intestine                                   |
| 45.71 | Open and other multiple segmental resection of large intestine     |
| 45.72 | Open and other cecectomy                                           |
| 45.73 | Open and other right hemicolectomy                                 |
| 45.74 | Open and other resection of transverse colon                       |
| 45.75 | Open and other left hemicolectomy                                  |
| 45.76 | Open and other sigmoidectomy                                       |
| 45.79 | Other and unspecified partial excision of large intestine          |
| 45.82 | Open total intra-abdominal colectomy                               |
| 45.83 | Other and unspecified total intra-abdominal colectomy              |
| 45.90 | Intestinal anastomosis, not otherwise specified                    |
| 45.91 | Small-to-small intestinal anastomosis                              |
| 45.92 | Anastomosis of small intestine to rectal stump                     |
| 45.93 | Other small-to-large intestinal anastomosis                        |
| 45.94 | Large-to-large intestinal anastomosis                              |
| 45.95 | Anastomosis to anus                                                |
| 46.01 | Exteriorization of small intestine                                 |
| 46.02 | Resection of exteriorized segment of small intestine               |
| 46.03 | Exteriorization of large intestine                                 |
| 46.04 | Resection of exteriorized segment of large intestine               |
| 46.10 | Colostomy, not otherwise specified                                 |
| 46.11 | Temporary colostomy                                                |
| 46.13 | Permanent colostomy                                                |
| 46.14 | Delayed opening of colostomy                                       |
| 46.20 | Ileostomy, not otherwise specified                                 |
| 46.21 | Temporary ileostomy                                                |
| 46.22 | Continent ileostomy                                                |
| 46.23 | Other permanent ileostomy                                          |
| 46.24 | Delayed opening of ileostomy                                       |
| 46.31 | Delayed opening of other enterostomy                               |
| 46.32 | Percutaneous (endoscopic) jejunostomy [PEJ]                        |
| 46.39 | Other enterostomy                                                  |
| 46.40 | Revision of intestinal stoma, not otherwise specified              |
| 46.41 | Revision of stoma of small intestine                               |
| 46.42 | Repair of pericostomy hernia                                       |
| 46.43 | Other revision of stoma of large intestine                         |
| 46.50 | Closure of intestinal stoma, not otherwise specified               |
| 46.51 | Closure of stoma of small intestine                                |
| 46.52 | Closure of stoma of large intestine                                |
| 46.60 | Fixation of intestine, not otherwise specified                     |
| 46.61 | Fixation of small intestine to abdominal wall                      |
| 46.62 | Other fixation of small intestine                                  |
| 46.63 | Fixation of large intestine to abdominal wall                      |
| 46.64 | Other fixation of large intestine                                  |
| 46.71 | Suture of laceration of duodenum                                   |
| 46.72 | Closure of fistula of duodenum                                     |
| 46.73 | Suture of laceration of small intestine, except duodenum           |
| 46.74 | Closure of fistula of small intestine, except duodenum             |
| 46.75 | Suture of laceration of large intestine                            |
| 46.76 | Closure of fistula of large intestine                              |
| 46.79 | Other repair of intestine                                          |
| 46.80 | Intra-abdominal manipulation of intestine, not otherwise specified |
| 46.81 | Intra-abdominal manipulation of small intestine                    |
| 46.82 | Intra-abdominal manipulation of large intestine                    |
| 46.85 | Dilation of intestine                                              |
| 46.86 | Endoscopic insertion of colonic stent(s)                           |

|       |                                                                           |
|-------|---------------------------------------------------------------------------|
| 46.87 | Other insertion of colonic stent(s)                                       |
| 46.91 | Myotomy of sigmoid colon                                                  |
| 46.92 | Myotomy of other parts of colon                                           |
| 46.93 | Revision of anastomosis of small intestine                                |
| 46.94 | Revision of anastomosis of large intestine                                |
| 46.95 | Local perfusion of small intestine                                        |
| 46.96 | Local perfusion of large intestine                                        |
| 46.97 | Transplant of intestine                                                   |
| 46.99 | Other operations on intestines                                            |
| 47.09 | Other appendectomy                                                        |
| 47.19 | Other incidental appendectomy                                             |
| 47.91 | Appendicostomy                                                            |
| 47.92 | Closure of appendiceal fistula                                            |
| 47.99 | Other operations on appendix                                              |
| 48.21 | Transabdominal proctosigmoidoscopy                                        |
| 48.22 | Proctosigmoidoscopy through artificial stoma                              |
| 48.23 | Rigid proctosigmoidoscopy                                                 |
| 48.25 | Open biopsy of rectum                                                     |
| 48.26 | Biopsy of perirectal tissue                                               |
| 48.29 | Other diagnostic procedures on rectum, rectosigmoid and perirectal tissue |
| 48.31 | Radical electrocoagulation of rectal lesion or tissue                     |
| 48.32 | Other electrocoagulation of rectal lesion or tissue                       |
| 48.33 | Destruction of rectal lesion or tissue by laser                           |
| 48.34 | Destruction of rectal lesion or tissue by cryosurgery                     |
| 48.35 | Local excision of rectal lesion or tissue                                 |
| 48.40 | Pull-through resection of rectum, not otherwise specified                 |
| 48.41 | Soave submucosal resection of rectum                                      |
| 48.43 | Open pull-through resection of rectum                                     |
| 48.49 | Other pull-through resection of rectum                                    |
| 48.50 | Abdominoperineal resection of the rectum, not otherwise specific          |
| 48.52 | Open abdominoperineal resection of the rectum                             |
| 48.59 | Other abdominoperineal resection of the rectum                            |
| 48.61 | Transsacral rectosigmoidectomy                                            |
| 48.62 | Anterior resection of rectum with synchronous colostomy                   |
| 48.63 | Other anterior resection of rectum                                        |
| 48.64 | Posterior resection of rectum                                             |
| 48.65 | Duhamel resection of rectum                                               |
| 48.69 | Other resection of rectum                                                 |
| 48.71 | Suture of laceration of rectum                                            |
| 48.72 | Closure of proctostomy                                                    |
| 48.73 | Closure of other rectal fistula                                           |
| 48.74 | Rectorectostomy                                                           |
| 48.75 | Abdominal proctopexy                                                      |
| 48.76 | Other proctopexy                                                          |
| 48.79 | Other repair of rectum                                                    |
| 48.81 | Incision of perirectal tissue                                             |
| 48.82 | Excision of perirectal tissue                                             |
| 48.91 | Incision of rectal stricture                                              |
| 48.92 | Anorectal myectomy                                                        |
| 48.93 | Repair of perirectal fistula                                              |
| 48.99 | Other operations on rectum and perirectal tissue                          |
| 49.01 | Incision of perianal abscess                                              |
| 49.02 | Other incision of perianal tissue                                         |
| 49.03 | Excision of perianal skin tags                                            |
| 49.04 | Other excision of perianal tissue                                         |
| 49.11 | Anal fistulotomy                                                          |
| 49.12 | Anal fistulectomy                                                         |
| 49.21 | Anoscopy                                                                  |
| 49.22 | Biopsy of perianal tissue                                                 |

|       |                                                                   |
|-------|-------------------------------------------------------------------|
| 51.03 | Other cholecystostomy                                             |
| 51.04 | Other cholecystotomy                                              |
| 51.21 | Other partial cholecystectomy                                     |
| 51.22 | Cholecystectomy                                                   |
| 51.31 | Anastomosis of gallbladder to hepatic ducts                       |
| 51.32 | Anastomosis of gallbladder to intestine                           |
| 51.33 | Anastomosis of gallbladder to pancreas                            |
| 51.34 | Anastomosis of gallbladder to stomach                             |
| 51.35 | Other gallbladder anastomosis                                     |
| 51.36 | Choledochoenterostomy                                             |
| 51.37 | Anastomosis of hepatic duct to gastrointestinal tract             |
| 51.39 | Other bile duct anastomosis                                       |
| 51.41 | Common duct exploration for removal of calculus                   |
| 51.42 | Common duct exploration for relief of other obstruction           |
| 51.43 | Insertion of choledochohepatic tube for decompression             |
| 51.49 | Incision of other bile ducts for relief of obstruction            |
| 51.51 | Exploration of common duct                                        |
| 51.59 | Other incision of other bile duct                                 |
| 51.61 | Excision of cystic duct remnant                                   |
| 51.62 | Excision of ampulla of Vater (with reimplantation of common duct) |
| 51.63 | Other excision of common duct                                     |
| 54.23 | Biopsy of peritoneum                                              |
| 54.25 | Peritoneal lavage                                                 |
| 54.29 | Other diagnostic procedures on abdominal region                   |
| 54.74 | Other repair of omentum                                           |
| 54.75 | Other repair of mesentery                                         |
| 54.91 | Percutaneous abdominal drainage                                   |
| 54.93 | Creation of cutaneoperitoneal fistula                             |
| 54.94 | Creation of peritoneovascular shunt                               |
| 44.00 | Vagotomy, not otherwise specified                                 |
| 44.13 | Other gastroscopy                                                 |
| 44.15 | Open biopsy of stomach                                            |
| 44.42 | Suture of duodenal ulcer site                                     |

**G. Surveillance Imaging (CPT codes)**

CT: 72191-72194, 74150-74179, 74262, 74263, 75635

MRI: 72195-72198, 74181-74185

Ultrasound: 76770, 76775, 93975, 93976, 93978, 93979

**Supplemental Table H.** Other DRGs assigned to index endovascular and open AAA repair \*

| <i>DRG</i> | <i>% (n)</i> | <i>Mean payment, \$</i> | <i>CMS Description</i>                                                                                                              |
|------------|--------------|-------------------------|-------------------------------------------------------------------------------------------------------------------------------------|
| 3          | 15.6 (35)    | \$183,192               | ECMO or tracheostomy with mechanical ventilation 96+ hours or principal diagnosis except face, mouth & neck with major OR procedure |
| 219        | 5.3 (12)     | \$84,460                | Cardiac valve and other major cardiothoracic procedure without cardiac catheterization with MCC                                     |
| 233        | 4.9 (11)     | \$61,801                | Coronary bypass with cardiac catheterization with MCC                                                                               |
| 253        | 8.9 (20)     | \$22,894                | Other vascular procedures with CC                                                                                                   |
| 254        | 22.2 (50)    | \$15,814                | Other vascular procedures without CC/MCC                                                                                            |

\* 46 other DRG index codes were also assigned to index endovascular or open repair with a frequency of <11

**Supplemental Table I.** Number at risk, mortality, censorship and event rates by interval of follow-up

|                                              | <b>Follow-up Interval</b> |                    |                  |                  |                  |                  |                  |                  |
|----------------------------------------------|---------------------------|--------------------|------------------|------------------|------------------|------------------|------------------|------------------|
|                                              | <i>1-90 days</i>          | <i>91-365 days</i> | <i>1-2 years</i> | <i>2-3 years</i> | <i>3-4 years</i> | <i>4-5 years</i> | <i>5-6 years</i> | <i>6-7 years</i> |
| <b>Number at risk</b>                        |                           |                    |                  |                  |                  |                  |                  |                  |
| EVR                                          | 6775                      | 6222               | 4767             | 3173             | 1927             | 1021             | 557              | 326              |
| Open                                         | 1822                      | 1718               | 1467             | 1116             | 832              | 618              | 443              | 342              |
| <b>Mortality, % (n)</b>                      |                           |                    |                  |                  |                  |                  |                  |                  |
| EVR                                          | 1.8 (121)                 | 4.4 (273)          | 6.3 (299)        | 6.4 (203)        | 7.0 (135)        | 7.3 (75)         | 9.9 (55)         | 10.7 (35)        |
| Open                                         | 2.7 (49)                  | 3.7 (64)           | 4.2 (62)         | 5.2 (59)         | 5.6 (47)         | 7.4 (46)         | 9.3 (41)         | 11.4 (39)        |
| <b>Censored, % (n)</b>                       |                           |                    |                  |                  |                  |                  |                  |                  |
| EVR                                          | 6.4 (432)                 | 19.0 (1182)        | 27.2 (1295)      | 32.9 (1043)      | 40.0 (771)       | 38.1 (389)       | 31.6 (176)       | 24.2 (79)        |
| Open                                         | 3.0 (55)                  | 10.9 (187)         | 19.7 (289)       | 20.2 (225)       | 20.1 (167)       | 20.9 (129)       | 13.5 (60)        | 9.4 (32)         |
| <b>AAA-related procedure, % (n)</b>          |                           |                    |                  |                  |                  |                  |                  |                  |
| EVR                                          | 1.9 (131)                 | 2.2 (134)          | 2.5 (119)        | 2.9 (92)         | 2.1 (41)         | 2.7 (28)         | 2.5 (14)         | *                |
| Open                                         | 1.4 (26)                  | 1.9 (32)           | 1.3 (19)         | 1.3 (15)         | 2.0 (17)         | *                | *                | *                |
| <b>Abdominal wall procedure, % (n)</b>       |                           |                    |                  |                  |                  |                  |                  |                  |
| EVR                                          | 0.3 (19)                  | 0.4 (26)           | 0.6 (28)         | *                | *                | *                | *                | *                |
| Open                                         | 0.8 (15)                  | 1.5 (25)           | 1.4 (21)         | 1.1 (12)         | *                | *                | *                | *                |
| <b>Other vascular procedure, % (n)</b>       |                           |                    |                  |                  |                  |                  |                  |                  |
| EVR                                          | 0.6 (44)                  | 0.9 (56)           | 1.0 (46)         | 0.5 (16)         | 0.7 (13)         | *                | *                | *                |
| Open                                         | 0.8 (14)                  | 1.2 (21)           | 1.1 (16)         | *                | *                | *                | *                | *                |
| <b>Other abdominopelvic procedure, % (n)</b> |                           |                    |                  |                  |                  |                  |                  |                  |
| EVR                                          | 0.7 (50)                  | 1.0 (64)           | 1.1 (51)         | 0.9 (27)         | 0.7 (13)         | 1.3 (13)         | *                | *                |
| Open                                         | 1.3 (23)                  | 1.3 (23)           | 1.0 (15)         | *                | *                | *                | *                | *                |
| <b>Inpatient admissions, % (n)</b>           |                           |                    |                  |                  |                  |                  |                  |                  |
| EVR                                          | 13.3 (900)                | 18.9 (1174)        | 22.6 (1079)      | 21.1 (668)       | 20.9 (403)       | 20.9 (213)       | 27.3 (152)       | 24.5 (80)        |
| Open                                         | 18.1 (329)                | 17.8 (305)         | 19.0 (278)       | 22.4 (250)       | 21.2 (176)       | 22.7 (140)       | 25.3 (112)       | 29.5 (101)       |
| <b>Imaging, % (n)</b>                        |                           |                    |                  |                  |                  |                  |                  |                  |
| EVR                                          | 81.6 (5529)               | 76.6 (4769)        | 79.0 (3764)      | 71.1 (2255)      | 66.0 (1272)      | 65.3 (667)       | 60.3 (336)       | 58.9 (192)       |
| Open                                         | 23.7 (431)                | 37.4 (642)         | 46.1 (677)       | 36.6 (408)       | 36.3 (302)       | 32.5 (201)       | 33.0 (146)       | 35.7 (122)       |

\* Cells with counts <11 suppressed per CMS requirements
